# Supplementary material for: Age-related changes in plasma biomarkers and their association with mortality in COVID-19
Source: PubMed Central journal article supplement — Eur Respir J. 2023 Jul 6;62(1):2300011. doi: 10.1183/13993003.00011-2023 (PMC10151455; doi:10.1183/13993003.00011-2023), 2023-07-06

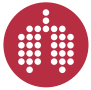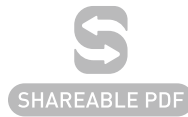

# Age-related changes in plasma biomarkers and their association with mortality in COVID-19

Erik H.A. Michels , Brent Appelman , Justin de Brabander, Rombout B.E. van Amstel, Osoul Chouchane, Christine C.A. van Linge, Alex R. Schuurman , Tom D.Y. Reijnders, Titia A.L. Sulzer, Augustijn M. Klarenbeek, Renée A. Douma, Amsterdam UMC COVID-19 Biobank Study Group, Lieuwe D.J. Bos , W. Joost Wiersinga, Hessel Peters-Sengers  and Tom van der Poll

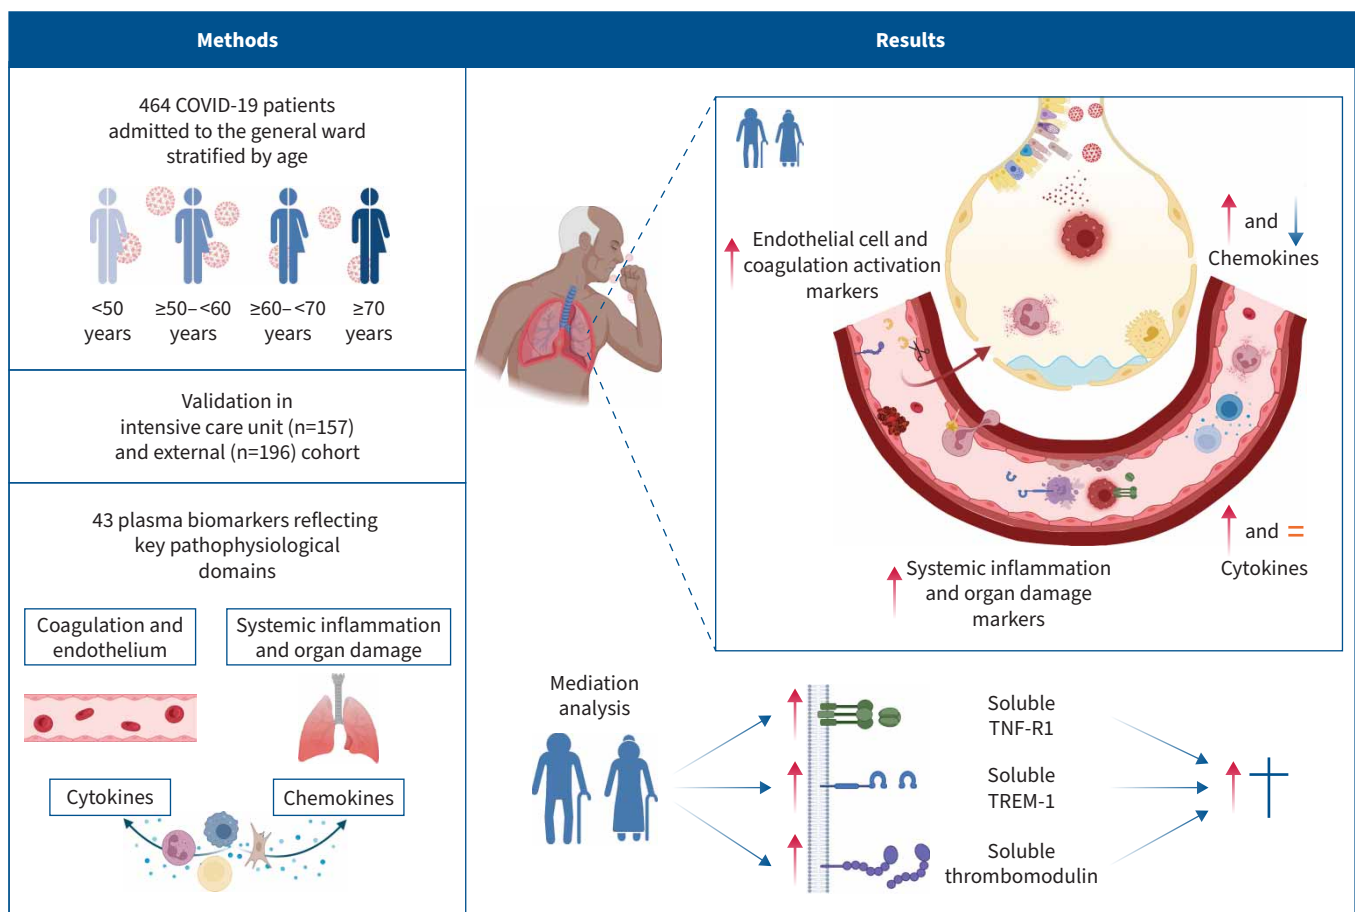

**GRAPHICAL ABSTRACT** Overview of the study findings. TNF-R1: tumour necrosis factor receptor 1; TREM-1: triggering receptor expressed on myeloid cells 1. Figure partially created with BioRender.com.

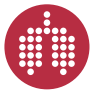

# Age-related changes in plasma biomarkers and their association with mortality in COVID-19

Erik H.A. Michels <sup>1</sup>, Brent Appelman <sup>1</sup>, Justin de Brabander <sup>1</sup>, Rombout B.E. van Amstel <sup>2</sup>, Osoul Chouchane <sup>1</sup>, Christine C.A. van Linge <sup>1</sup>, Alex R. Schuurman <sup>1</sup>, Tom D.Y. Reijnders <sup>1</sup>, Titia A.L. Sulzer <sup>1</sup>, Augustijn M. Klarenbeek <sup>1</sup>, Renée A. Douma <sup>3</sup>, Amsterdam UMC COVID-19 Biobank Study Group, Lieuwe D.J. Bos <sup>2</sup>, W. Joost Wiersinga <sup>1,4</sup>, Hessel Peters-Sengers <sup>1,5</sup> and Tom van der Poll <sup>1,4</sup>

<sup>1</sup>Amsterdam UMC, location University of Amsterdam, Center for Experimental and Molecular Medicine (CEMM), Amsterdam, The Netherlands. <sup>2</sup>Amsterdam UMC, location University of Amsterdam, Department of Intensive Care Medicine, Amsterdam, The Netherlands. <sup>3</sup>Flevo Hospital, Department of Internal Medicine, Almere, The Netherlands. <sup>4</sup>Amsterdam UMC, location University of Amsterdam, Division of Infectious Diseases, Amsterdam, The Netherlands. <sup>5</sup>Amsterdam UMC, location Vrije Universiteit Amsterdam, Department of Epidemiology and Data Science, Amsterdam, The Netherlands.

Corresponding author: Erik H.A. Michels (e.h.michels@amsterdamumc.nl)

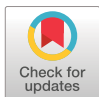

Shareable abstract (@ERSpublications)

In COVID-19, specific ageing-related alterations in the host response likely contribute to the increased mortality in older patients. Evidence is provided for potential age-specific immunomodulatory targets across four pathophysiological COVID-19 domains. <https://bit.ly/3mIMt4l>

**Cite this article as:** Michels EHA, Appelman B, de Brabander J, *et al.* Age-related changes in plasma biomarkers and their association with mortality in COVID-19. *Eur Respir J* 2023; 62: 2300011 [DOI: 10.1183/13993003.00011-2023].

This extracted version can be shared freely online.

Copyright ©The authors 2023.

This version is distributed under the terms of the Creative Commons Attribution Non-Commercial Licence 4.0. For commercial reproduction rights and permissions contact [permissions@ersnet.org](mailto:permissions@ersnet.org)

This article has an editorial commentary:  
<https://doi.org/10.1183/13993003.00796-2023>

Received: 3 Jan 2023  
Accepted: 10 April 2023

## Abstract

**Background** Coronavirus disease 2019 (COVID-19)-induced mortality occurs predominantly in older patients. Several immunomodulating therapies seem less beneficial in these patients. The biological substrate behind these observations is unknown. The aim of this study was to obtain insight into the association between ageing, the host response and mortality in patients with COVID-19.

**Methods** We determined 43 biomarkers reflective of alterations in four pathophysiological domains: endothelial cell and coagulation activation, inflammation and organ damage, and cytokine and chemokine release. We used mediation analysis to associate ageing-driven alterations in the host response with 30-day mortality. Biomarkers associated with both ageing and mortality were validated in an intensive care unit and external cohort.

**Results** 464 general ward patients with COVID-19 were stratified according to age decades. Increasing age was an independent risk factor for 30-day mortality. Ageing was associated with alterations in each of the host response domains, characterised by greater activation of the endothelium and coagulation system and stronger elevation of inflammation and organ damage markers, which was independent of an increase in age-related comorbidities. Soluble tumour necrosis factor receptor 1, soluble triggering receptor expressed on myeloid cells 1 and soluble thrombomodulin showed the strongest correlation with ageing and explained part of the ageing-driven increase in 30-day mortality (proportion mediated: 13.0%, 12.9% and 12.6%, respectively).

**Conclusions** Ageing is associated with a strong and broad modification of the host response to COVID-19, and specific immune changes likely contribute to increased mortality in older patients. These results may provide insight into potential age-specific immunomodulatory targets in COVID-19.

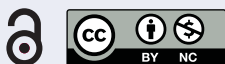

Supplement: ERJ-00011-2023.Shareable.pdf [file ERJ-00011-2023.Shareable.pdf]
